# Supplementary material
Source: publisher site journal article supplement (https://www.dovepress.com/article/452773)

**The supplementary materials of results of networks**

Supplementary Fig.s1 Accuracy of edge weights in item network of kinesiophobia


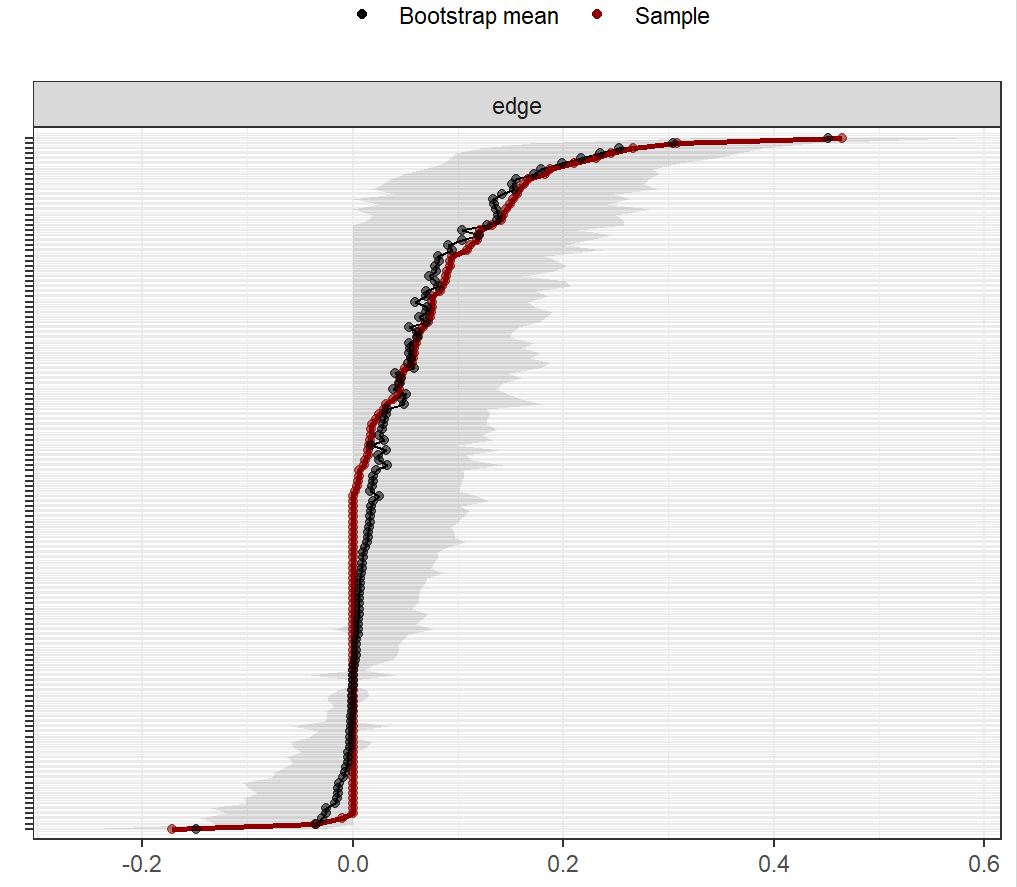


Supplementary Fig.s2 Bootstrapped difference test for edge weights in item network of kinesiophobia


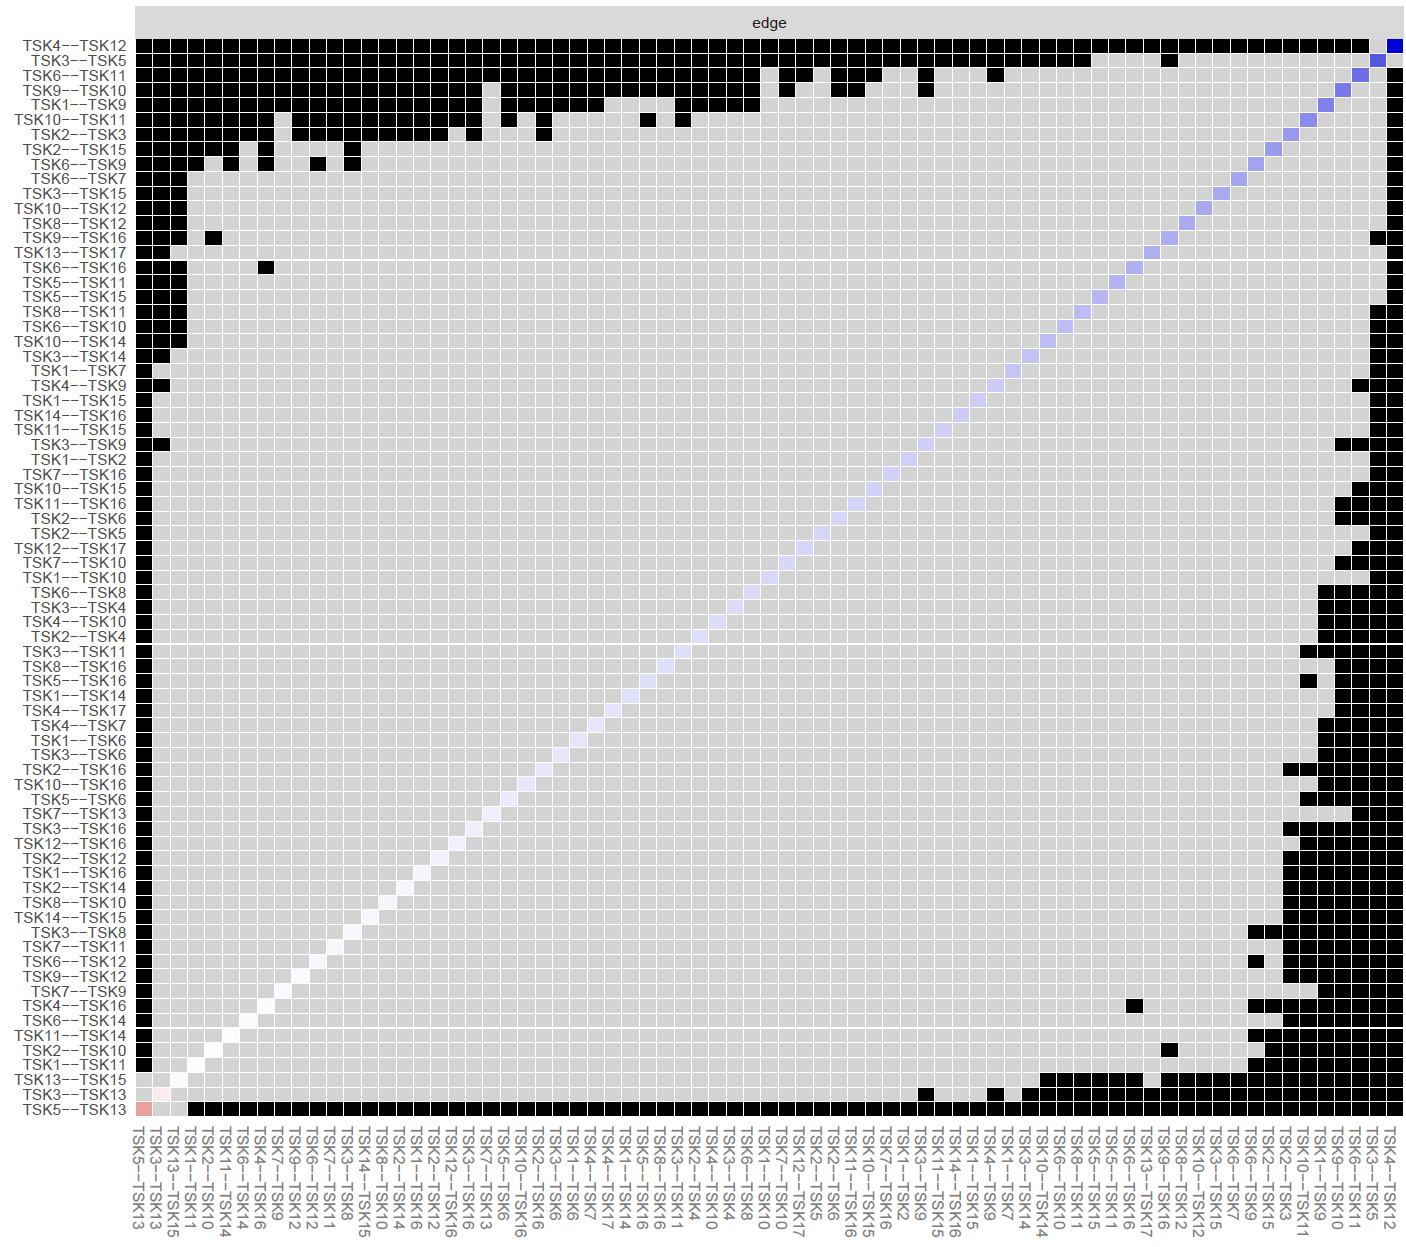


Supplementary Fig.s3 Stability of node strength in item network of kinesiophobia


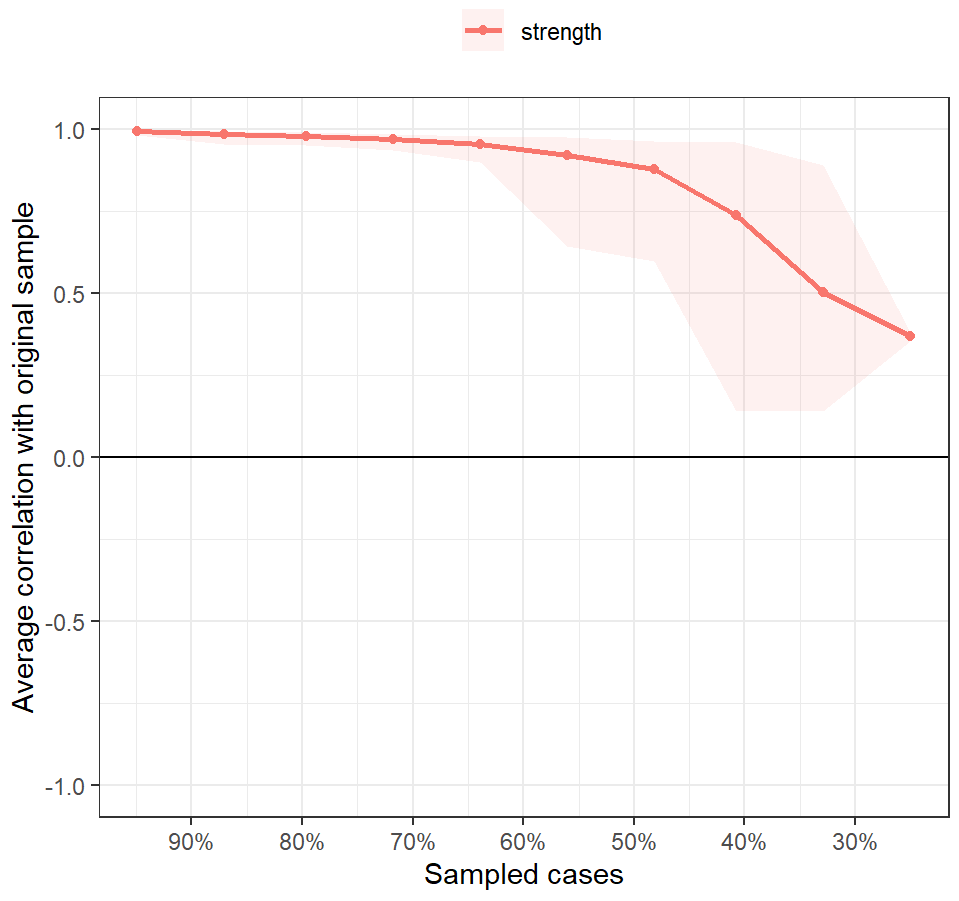


Supplementary Fig.s4 Bootstrapped difference test for node strength in item network of kinesiophobia


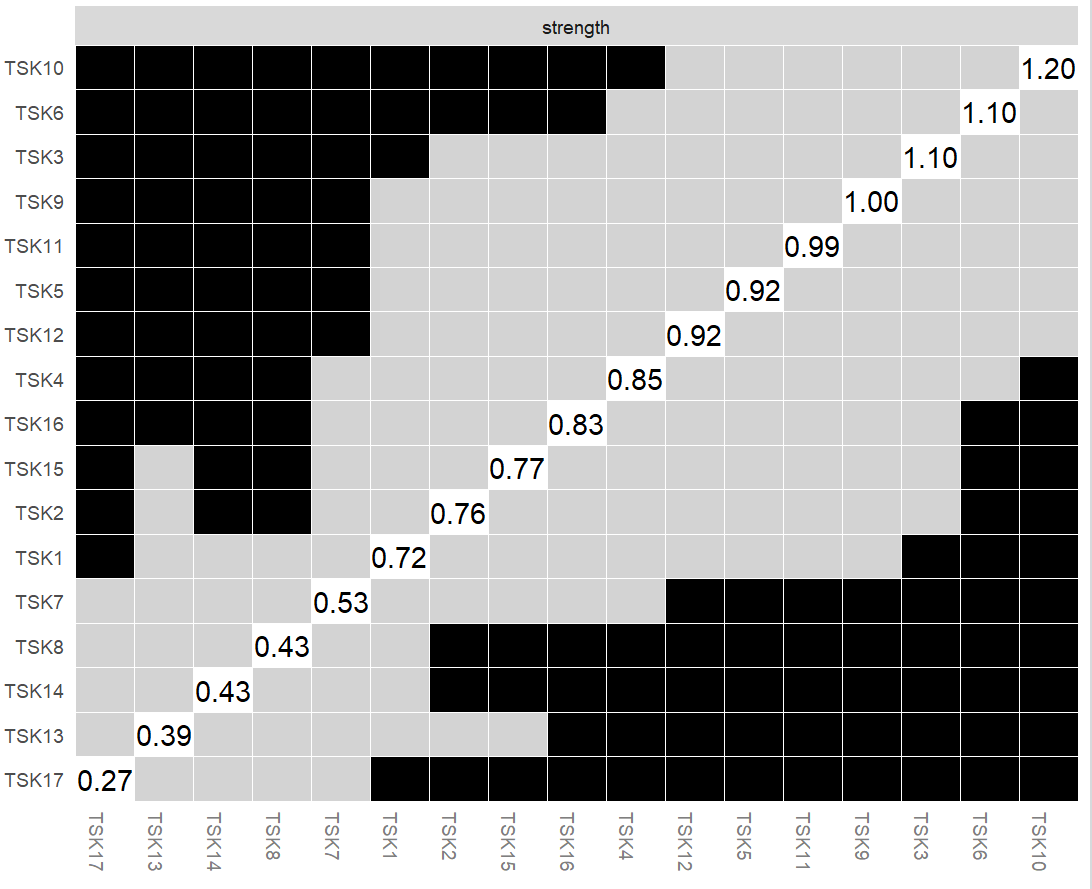


Supplementary Fig.s5 Accuracy of edge weights in pain catastrophizing/self-efficacy-kinesiophobia network


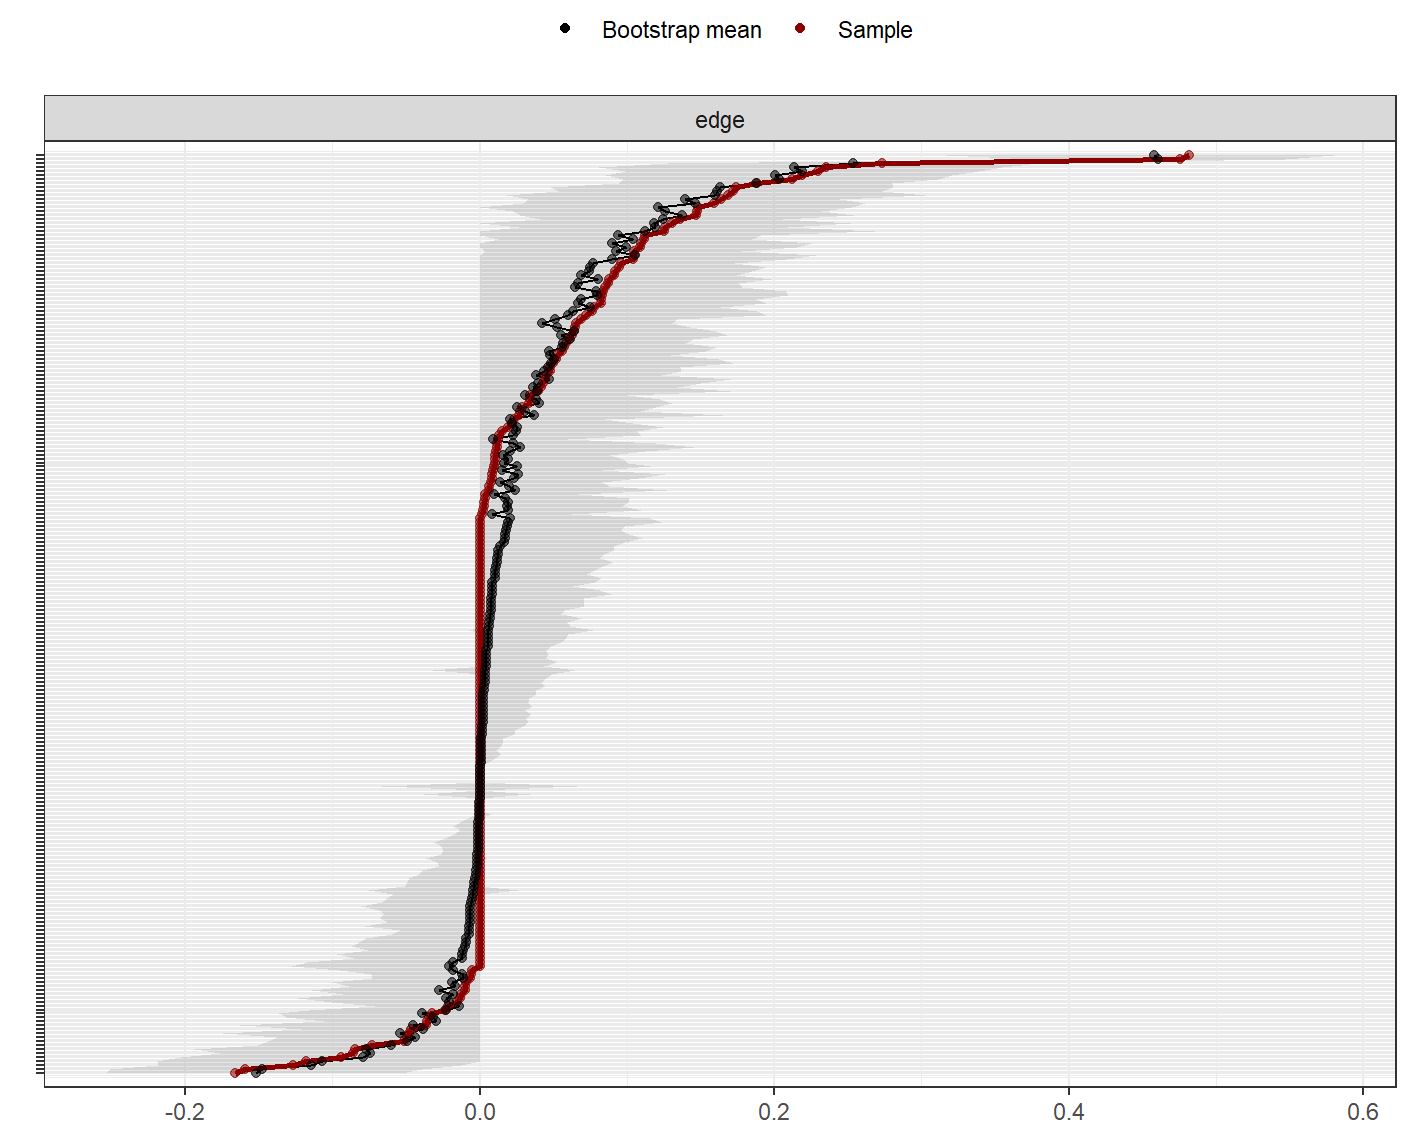


Supplementary Fig.s6 Bootstrapped difference test for edge weights in pain catastrophizing/self-efficacy-kinesiophobia network


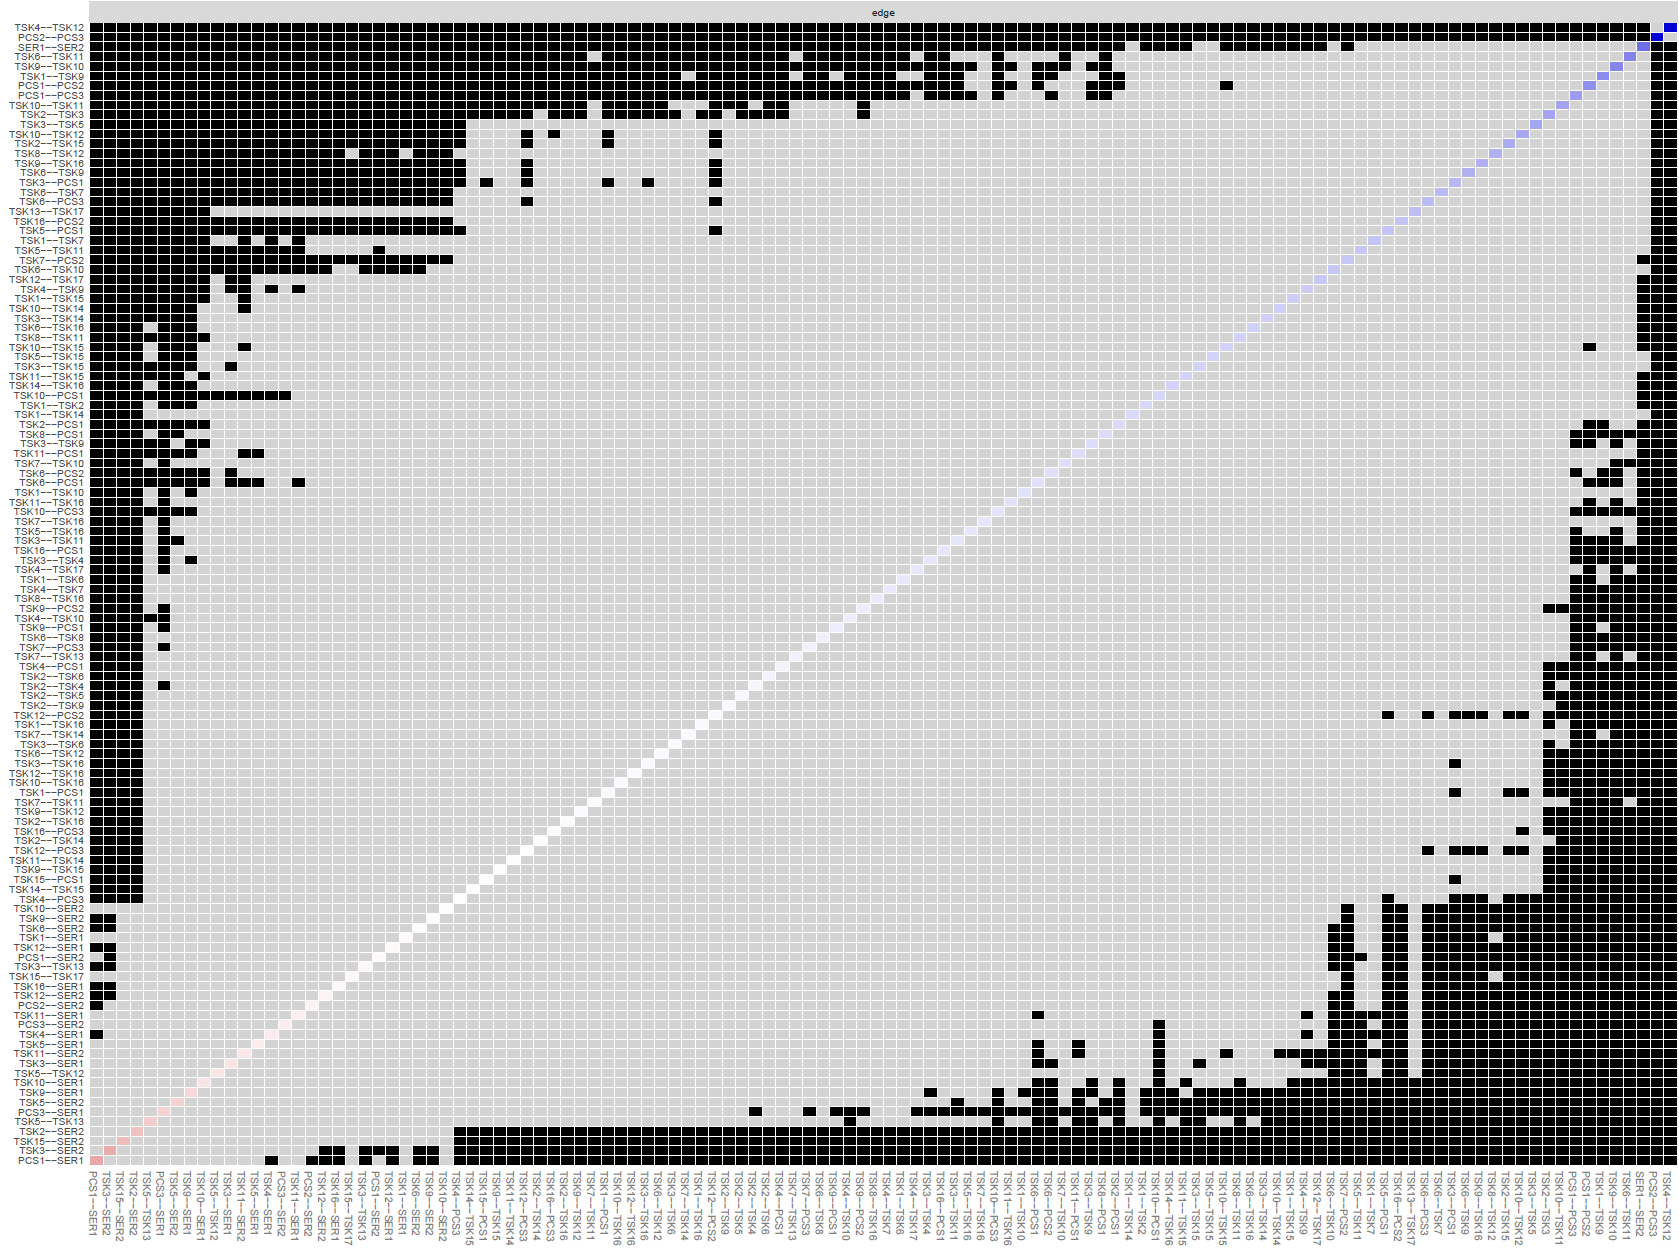


Supplementary Fig.s7 Stability of node bridge expected influences in pain catastrophizing/self-efficacy-kinesiophobia network


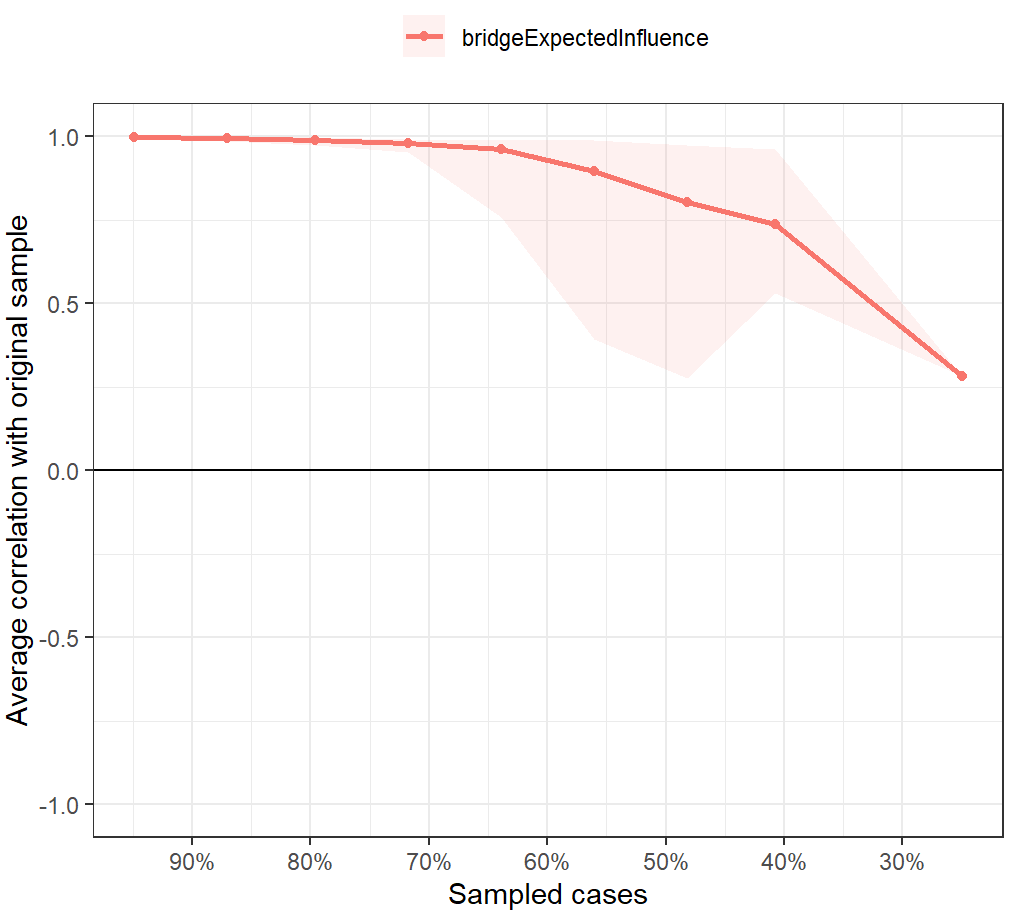


Supplementary Fig.s8 Bootstrapped difference test for node bridge expected influences in pain catastrophizing/self-efficacy-kinesiophobia network


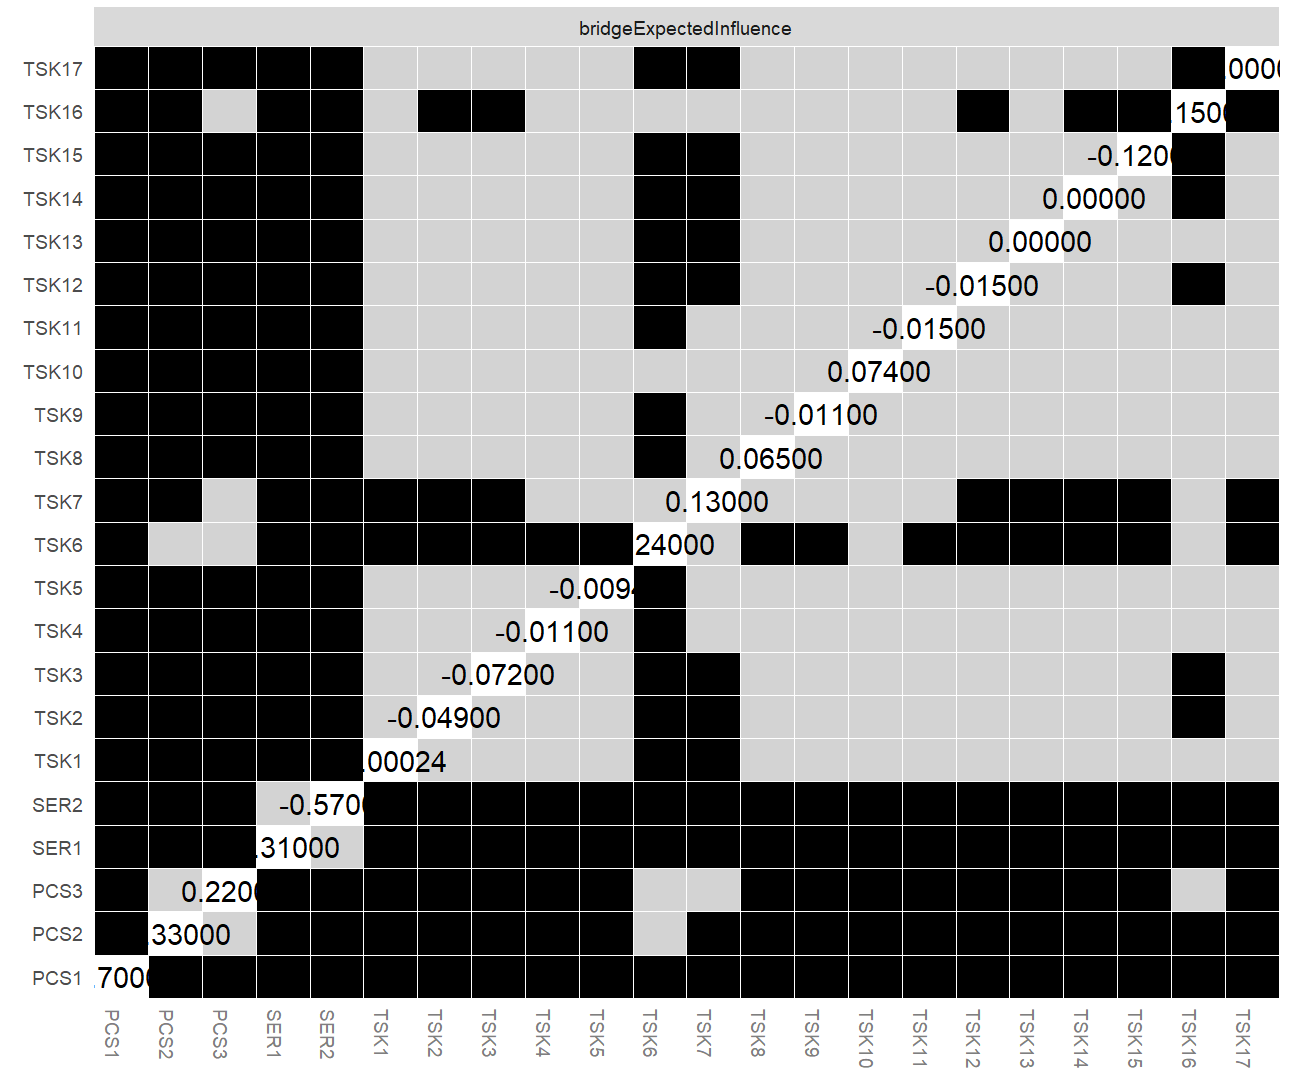

Supplement: Supplementary file 1 [file get_supplementary_file.php]
